# Supplementary material
Source: Springer Nature journal article supplement (https://www.springermedizin.de/resource/supplementary/12955_2013_1218_MOESM2_ESM.pdf/9559078)

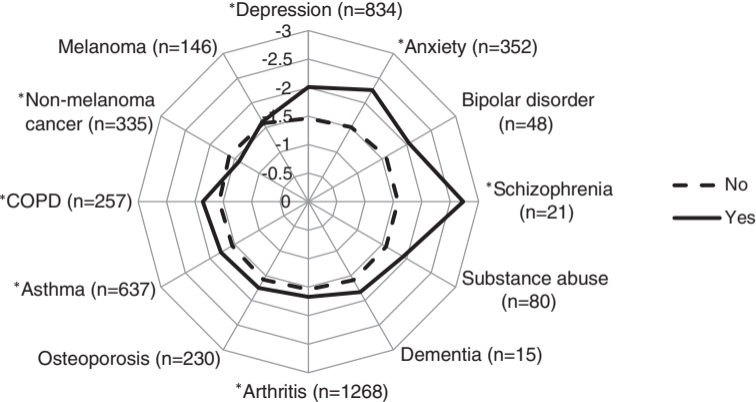

Supplement: MOESM2 [file 9559078]
